# Supplementary material
Source: MDPI journal article supplement (https://www.mdpi.com/2571-8797/4/2/23)
Supplement: s1 [file s1]

Archive with 1 entries (1 files):
- cleantechnol-1695354-supplementary.pdf
